# Supplementary material
Source: Springer Nature journal article supplement (https://www.springermedizin.de/resource/supplementary/12936_2012_2609_MOESM8_ESM.pdf/9543310)

**A****EBA-175**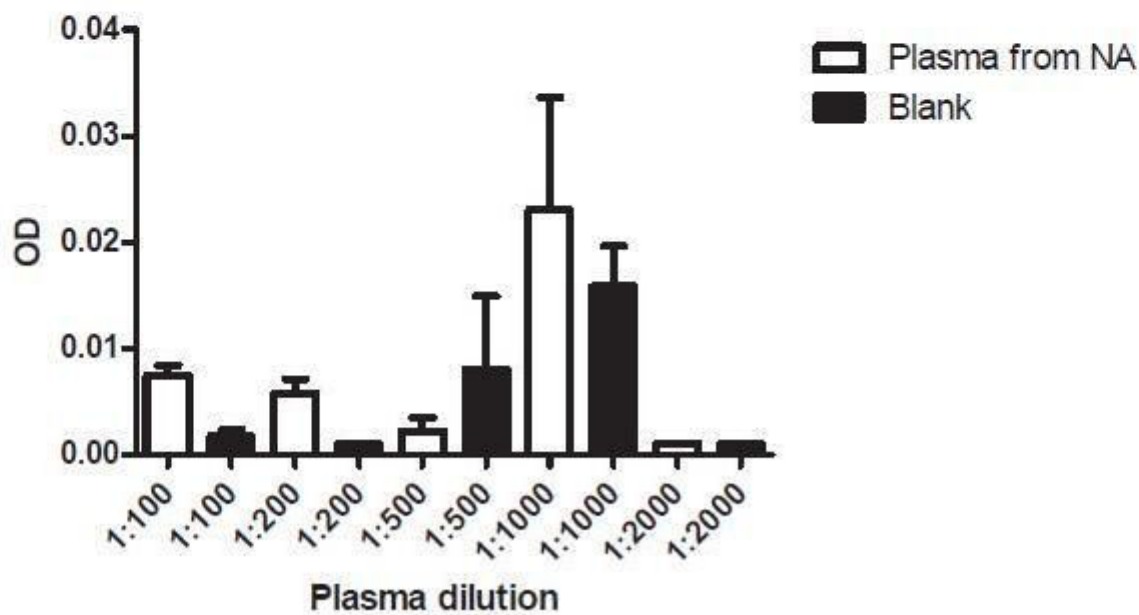**B****GLURP-R2**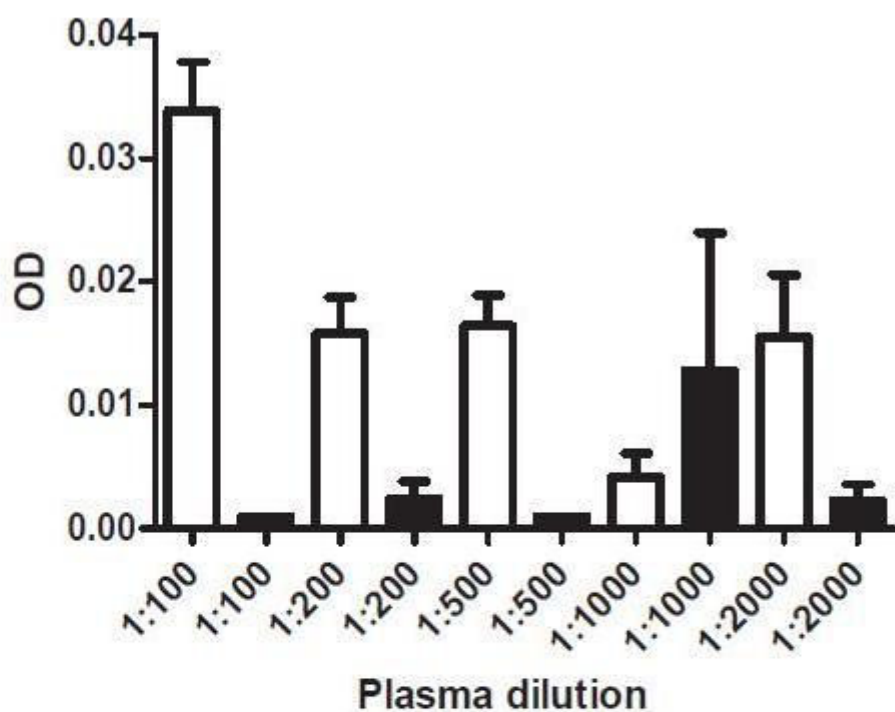

Supplement: MOESM8 [file 9543310]
